# Supplementary material for: Second-order nonlinear optical properties of X-shaped pyrazine derivatives
Source: Royal Society of Chemistry journal article supplement (doi:10.1039/d3cp04516a), 2023-12-08
Supplement: d3cp04516a1.pdf [file d3cp04516a1.pdf]

# Supporting Information:

## Second-order NonLinear Optical Properties of X-Shaped Pyrazine Derivatives

Verònica Postils,<sup>\*,†</sup> Zuzana Burešová,<sup>‡</sup> David Casanova,<sup>¶,§</sup> Benoît Champagne,<sup>||</sup>  
Filip Bureš,<sup>‡</sup> Vincent Rodriguez,<sup>\*,†</sup> and Frédéric Castet<sup>\*,†</sup>

<sup>†</sup>*Univ. Bordeaux, CNRS, Bordeaux INP, Institut des Sciences Moléculaires, UMR 5255,  
F-33400 Talence, France*

<sup>‡</sup>*Institute of Organic Chemistry and Technology, Faculty of Chemical Technology,  
University of Pardubice, Studentská 573, Pardubice 532 10, Czech Republic*

<sup>¶</sup>*Donostia International Physics Center (DIPC), Manuel Lardizabal Ibilbidea 4, 20018  
Donostia, Euskadi, Spain*

<sup>§</sup>*Ikerbasque Foundation for Science, Plaza Euskadi 5, 48009 Bilbao, Euskadi, Spain*

<sup>||</sup>*Unité de Chimie Physique Théorique et Structurale, Chemistry Department, Namur  
Institute of Structured Matter, University of Namur, Belgium*

E-mail: [vpostils@gmail.com](mailto:vpostils@gmail.com); [vincent.rodriquez@u-bordeaux.fr](mailto:vincent.rodriquez@u-bordeaux.fr); [frederic.castet@u-bordeaux.fr](mailto:frederic.castet@u-bordeaux.fr)

# Contents

|                                                                                                                                                                           |            |
|---------------------------------------------------------------------------------------------------------------------------------------------------------------------------|------------|
| <b>S1 Synthesis of compound 2D</b>                                                                                                                                        | <b>S3</b>  |
| <b>S2 HRS experiments</b>                                                                                                                                                 | <b>S5</b>  |
| S2.1 Scaling the quadratic dependence of the HRS Signal through power scans . . .                                                                                         | S5         |
| S2.2 Quantifying the dipolar/octupolar character of the HRS Response through<br>polarization scans . . . . .                                                              | S5         |
| <b>S3 Thermodynamic Analyses</b>                                                                                                                                          | <b>S9</b>  |
| <b>S4 Absorption properties and characterization of the excited states</b>                                                                                                | <b>S12</b> |
| S4.1 Rationalization of the different energy splitting between $S_0 \rightarrow S_1$ and $S_0 \rightarrow S_2$<br>transitions for the two families of compounds . . . . . | S17        |
| <b>S5 NLO properties</b>                                                                                                                                                  | <b>S18</b> |
| S5.1 Expression of the $\langle \beta_{ZZZ}^2 \rangle$ and $\langle \beta_{ZXX}^2 \rangle$ invariants . . . . .                                                           | S18        |
| S5.2 Hyper-Rayleigh Scattering data calculated in dichloromethane . . . . .                                                                                               | S19        |
| S5.3 Static $\beta_{zxx}$ and $\beta_{zzz}$ components calculated with Coupled-Perturbed Kohn-Sham                                                                        | S20        |
| S5.4 Derivation of the SOS expression of $\beta_{zxx}$ and $\beta_{zzz}$ . . . . .                                                                                        | S20        |
| S5.5 Calculation of transition electric dipole moments between excited states . . .                                                                                       | S24        |
| S5.6 Dipole and transition dipole moments of 1B-c and 2B-c . . . . .                                                                                                      | S25        |
| <b>References</b>                                                                                                                                                         | <b>S27</b> |

## S1 Synthesis of compound 2D

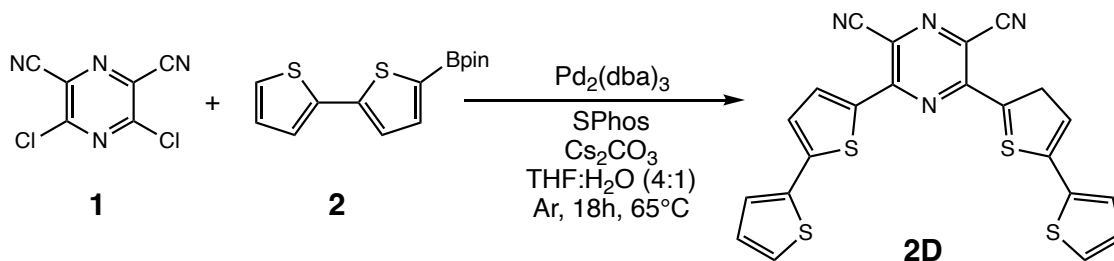

Figure S1: Synthesis of compound **2D**.

In a Schlenk flask, 3,5-dichloropyrazine-2,6-dicarbonitrile **1** (199 mg, 1.0 mmol) and pinacol ester **2** (347 mg, 2.1 mmol) were dissolved in the mixture of THF/H<sub>2</sub>O (40 ml, 4:1). Argon was bubbled through the solution for 10 min, after that  $\text{Pd}_2(\text{dba})_3$  (46 mg, 0.005 mmol, 5%), SPhos (21 mg, 0.005 mmol, 5%), and  $\text{Cs}_2\text{CO}_3$  (680 mg, 2.1 mmol) were added. The resulting reaction mixture was stirred at 65 °C for 18 h (Figure S1). The reaction mixture was diluted with water (20 ml) and extracted with DCM (3 x 20 ml). The combined organic extracts were dried over anhydrous  $\text{Na}_2\text{SO}_4$ , the solvents were evaporated *in vacuo*, and the crude product was purified by column chromatography ( $\text{SiO}_2$ , DCM:Hex 2:1) and subsequent crystallization from 1,2-dichloroethane/hexane. Compound **2D** is red solid (213 mg, 47 %); mp = 295 °C.

**<sup>1</sup>H NMR** (25 °C, 500 MHz, *d*<sub>6</sub>-DMSO):  $\delta$  = 8.29 (d, *J* = 4Hz, 2H), 7.74 (d, *J* = 5Hz, 2H), 7.66 (d, *J* = 3.5Hz, 2H), 7.62 (d, *J* = 4Hz, 2H), 7.21 (t, *J* = 4Hz, 2H) ppm. **<sup>13</sup>C NMR** (25 °C, 125 MHz, *d*<sub>6</sub>-DMSO):  $\delta$  = 149.10, 145.59, 135.52, 135.10, 133.17, 129.05, 128.44, 126.99, 126.51, 119.66, 116.12 ppm. **HR-FT-MALDI-MS** (DCTB) *m/z* calcd. for  $\text{C}_{22}\text{H}_{10}\text{N}_4\text{S}_4^+$  (M)<sup>+</sup> 457.97828; found 457.97824.

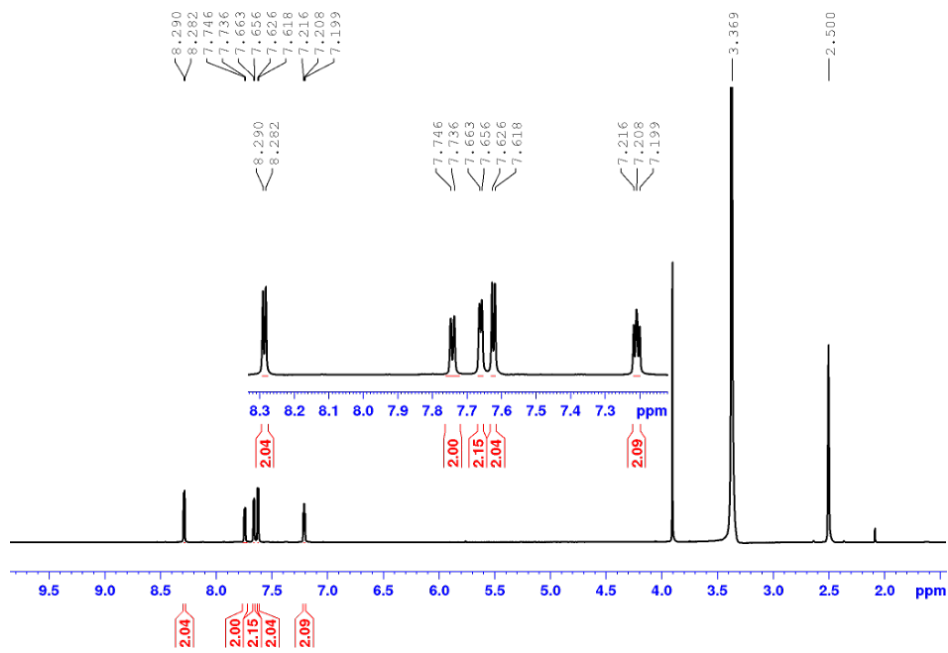

Figure S2:  $^1\text{H}$  NMR spectrum of compound **2D**.

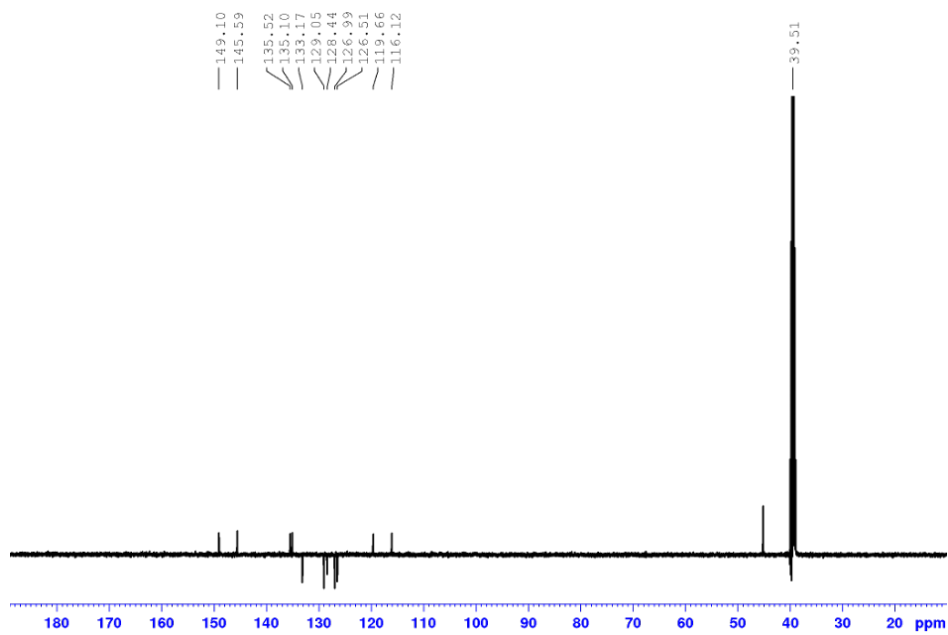

Figure S3:  $^{13}\text{C}$  NMR spectrum of compound **2D**.

## S2 HRS experiments

### S2.1 Scaling the quadratic dependence of the HRS Signal through power scans

The HRS amplitudes have first been obtained by performing power scans, *i.e.* by determining the coefficient of the quadratic dependence of the scattered intensity as a function of the incident intensity and for different solute concentrations (equation 1). The polarization configuration was set to vertical-vertical (VV), *i.e.* with vertically polarized incident light ( $\Psi = 90^\circ$ ) and scattered light analyzed vertically. Power scans were performed on diluted solutions at different concentrations (varying from  $10^{-4}$  M to  $1.5 \times 10^{-2}$  M depending on the NLO response of each compound). All experiments were carried out at room temperature. Each data point of the power scan was an average of 3 accumulations with an acquisition time of 20 s at 1064 nm and 30 s at 1300 nm to achieve a good signal-to-noise ratio, depending on the solution and excitation wavelength. The coefficient of quadratic dependence was obtained by fitting the power curves (see Figures S4 and S5) as a function of incident power ( $I_\omega$ ) and solute concentration ( $C_X$ ) using a custom-built 2D fitting function of the form:

$$I_{2\omega}^{\Psi V} = (p_1 + p_2 C_X)(I_\omega - p_3)^2 \quad (\text{S1})$$

where  $p_i$  ( $i = 1-3$ ) are (all positive) fitting parameters. The extracted quantity is  $C_{VV}\beta^2 = R.p_2/p_1$ , where  $R = [C\beta^2 C_{\Psi V}]_S = 6088$  a.u. is the chloroform contribution, used as the internal reference and assumed constant at both 1064 nm and 1300 nm wavelengths.

### S2.2 Quantifying the dipolar/octupolar character of the HRS Response through polarization scans

The depolarization ratios ( $DR$ ) were obtained by performing polarization scans, *i.e.* through stepwise variation of the incident light linear plane of polarization, at constant incident

power. The scattered intensity of the binary solution was measured for the pure solvent, and for the most concentrated binary solution to extract the chromophore contribution (Eq. 2). The polarization configuration was set to  $\Psi$ -V (where  $\Psi$  is the variable angle of the half-wave plate) for the incident and scattered lights, respectively. Polarization scans were performed between  $0^\circ$  and  $180^\circ$  in  $5^\circ$  steps. All experiments were carried out at room temperature. Each data point of the polarization scan was an average of three accumulations with an acquisition time of 20 s (1300 nm) or 30 s (1600 nm) each. The  $DR$  values were determined by fitting the polarization curves (see Figures S4 and S5) using a constrained custom-built fitting function of the form:

$$I_{2\omega}^{\Psi V} = A(\cos^4(\Psi - \Psi_0) + (1 + DR_i) \cos^2(\Psi - \Psi_0) \sin^2(\Psi - \Psi_0) + DR_i \sin^4(\Psi - \Psi_0)) \quad (\text{S2})$$

where the intensity factor  $A$ , the angular offset  $\Psi_0$  and the depolarization ratio  $DR_i$  are fitting parameters.

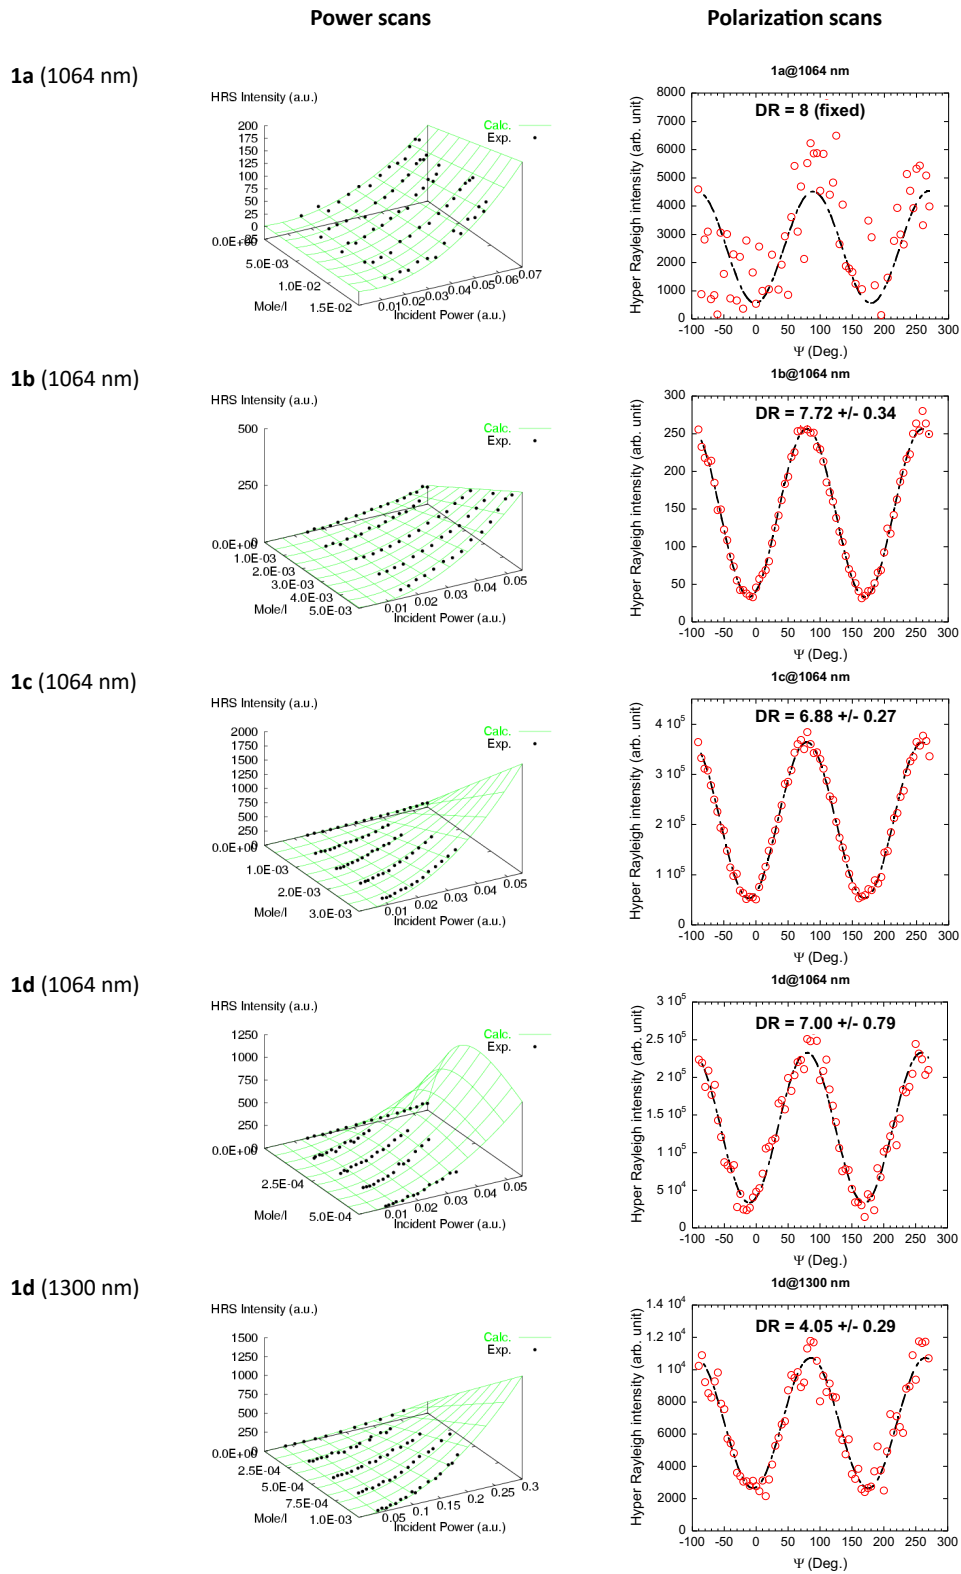

Figure S4: HRS power and polarization scans for derivatives of Family 1.

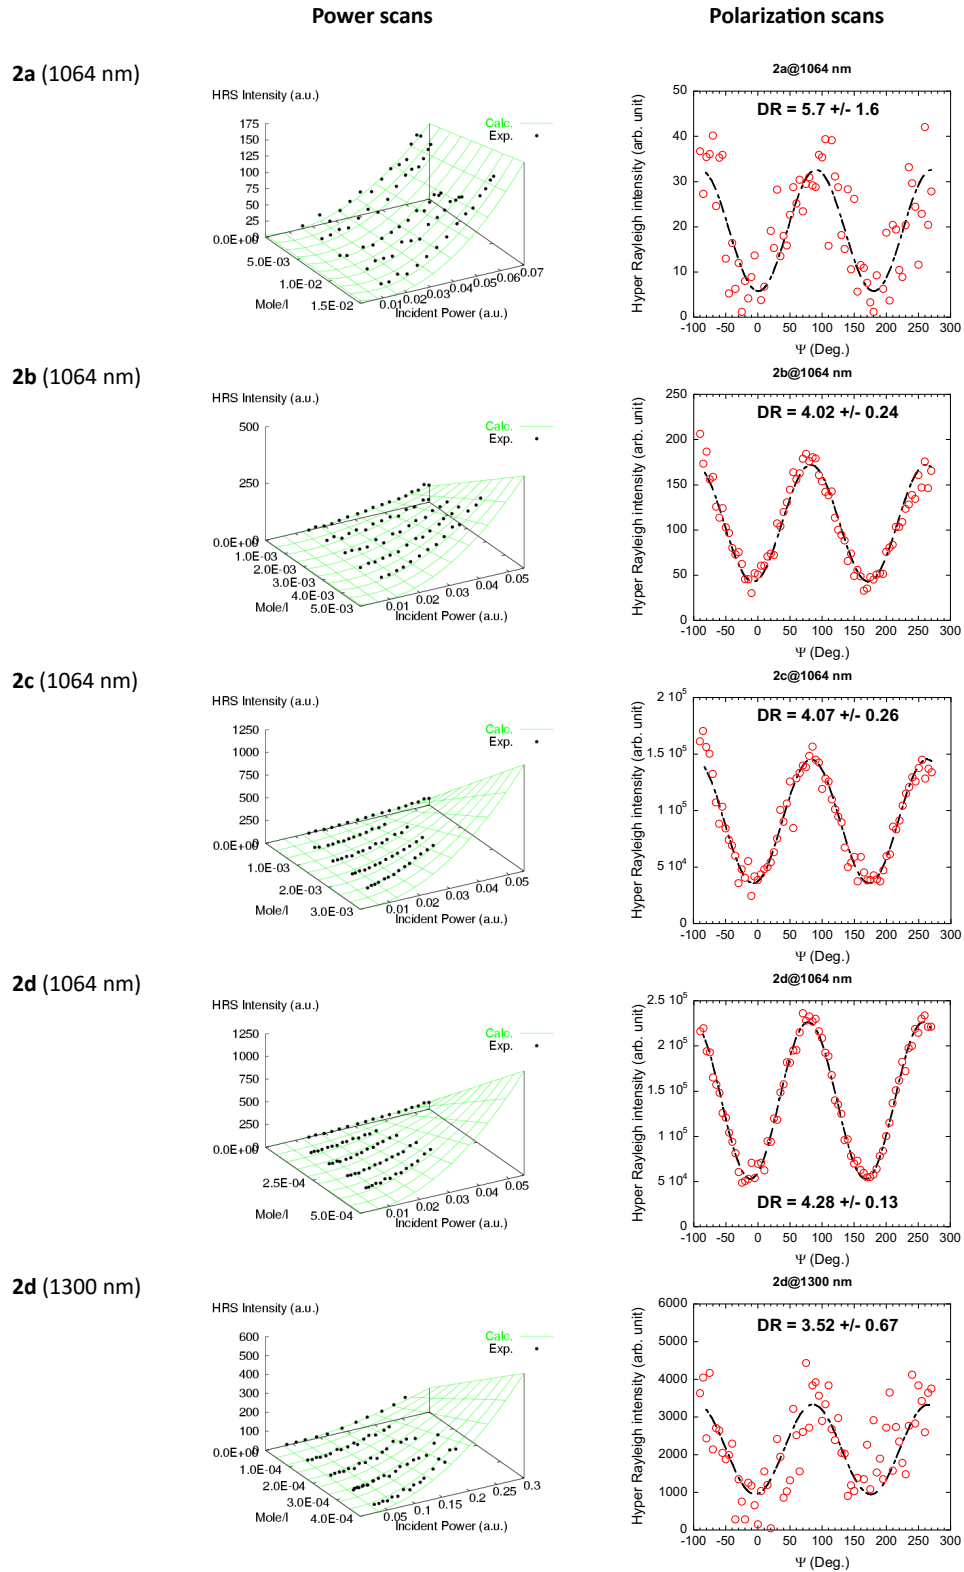

Figure S5: HRS power and polarization scans for derivatives of Family 2.



### S3 Thermodynamic Analyses

Table S1 presents all the conformational isomers characterized for the studied chromophores, together with structural details, relative energies, and Boltzmann statistical weights at room temperature. The later have been computed according to the standard expressions:

$$p_i = \frac{1}{Z} \exp\left(\frac{-\Delta G_i^\circ}{k_B T}\right) \quad ; \quad Z = \sum_{j=1} \exp\left(\frac{-\Delta G_j^\circ}{k_B T}\right) \quad (\text{S3})$$

where  $i$  is the conformer of interest,  $\Delta G_i^\circ$  and  $\Delta G_j^\circ$  are the relative Gibbs energies of states  $i$  and  $j$ , respectively,  $k_B$  is the Boltzmann constant,  $T$  refers to the assumed room temperature of 298.15K, and  $Z$  is the canonical partition function.  $Z$  acts as a normalization denominator that constrains the probabilities of all considered conformers  $j$  to add up to 1. Only conformers with general probabilities higher than 0.05 (5.0%) (*i.e.*,  $\Delta G^\circ < 1.65 \text{ kcal}\cdot\text{mol}^{-1}$  with respect to the most stable species) have been taken into account in the calculation of optical properties. When relevant, Boltzmann probabilities were recomputed limiting the considered conformers  $j$  to these ones.

In Table S1, the allocated molecular point groups are exact, or have been attributed within an error lower than 0.01Å, following Equation S4.<sup>S1</sup> Molecules that do not belong to an exact point group but fulfill the last condition are designated with an asterisk.

$$\text{error} = \frac{1}{n} \sum_{i=1}^n \max_j \frac{|A_j^i - B_j^i|}{r_j} \quad (\text{S4})$$

Equation S4 provides the error associated with a given symmetry element (*i.e.*, an axis or a plane), while  $i$  refers to the  $i^{\text{th}}$  symmetry operation associated within that element. Each atom of the molecule ( $A_j$ ) is defined within a symmetry operation ( $A_j^i$ ) and related through

Table S1: Point group, structural parameters ( $\phi_n$ , degrees), and relative Gibbs energies ( $\Delta G$ , kcalmol<sup>-1</sup>) of all the various conformational isomers of each chromophore. Dihedral angles  $\phi_n$  are defined on chromophore **2E** in Figure S6. Boltzmann probabilities are computed using Equation S3. (Considered) probabilities are re-scaled values considering only isomer with (General) probabilities >5.0%.

| Compound               | Point Group | Structural Parameters<br>$\phi_1, \phi_3, (\phi_5) / \phi_2, \phi_4, (\phi_6)$ | $\Delta G^{(1)}$ | Boltzmann Probability |                     |
|------------------------|-------------|--------------------------------------------------------------------------------|------------------|-----------------------|---------------------|
|                        |             |                                                                                |                  | (General)             | (Considered)        |
| <b>1A</b> -(c)         | C2v         | (0.00) / (0.00)                                                                | 3.31             | –                     | –                   |
| <b>2A</b> -(c)         | C2v         | (0.00) / (0.00)                                                                | 0.00             | –                     | –                   |
| <b>1B</b> -c           | C2*         | -25.42 / -25.30                                                                | 4.61 (0.00)      | 84.9                  | 87.9                |
| <b>1B</b> -t-c         | C1          | 29.05 / -142.67                                                                | 5.78 (1.17)      | 11.7                  | 12.1                |
| <b>1B</b> -t           | C1          | -147.35 / -124.08                                                              | 6.52 (1.91)      | 3.4                   | –                   |
| <b>2B</b> -c           | C2*         | 3.90 / 3.89                                                                    | 0.00             | 48.3                  | 67.9 <sup>(2)</sup> |
| <b>2B</b> -t-c         | CS          | 180.00 / 0.00                                                                  | 0.24             | 32.1                  | 32.1                |
| <b>2B</b> -c'          | C2          | 0.00 / 0.00                                                                    | 0.53             | 19.6                  | –                   |
| <b>1C</b> -c(t)        | C2*         | 19.38; (-179.49) / 19.42; (-179.50)                                            | 6.31 (0.00)      | 74.7                  | 75.5                |
| <b>1C</b> -c(c)        | C2*         | -19.44; (1.73) / -18.43; (1.71)                                                | 6.98 (0.67)      | 24.2                  | 24.5                |
| <b>1C</b> -t(t)        | C1          | -142.97; (179.99) / -134.44; (178.83)                                          | 8.92 (2.61)      | 0.9                   | –                   |
| <b>1C</b> -t(c)        | C2*         | -139.86; (1.75) / -139.83; (1.75)                                              | 9.89 (3.58)      | 0.2                   | –                   |
| <b>2C</b> -c(t)        | C2v         | 0.00; (180.00) / 0.00; (180.00)                                                | 0.00             | 91.4                  | 91.4                |
| <b>2C</b> -c(c)        | C2v*        | 0.01; (0.00) / 0.01; (0.00)                                                    | 1.40             | 8.5                   | 8.6                 |
| <b>2C</b> -t(t)        | C2          | -178.54; (-179.86) / -178.54; (-179.86)                                        | 4.64             | 0.04                  | –                   |
| <b>2C</b> -t(c)        | C2          | 178.51; (-0.26) / 178.51; (-0.26)                                              | 5.59             | 0.01                  | –                   |
| <b>1D</b> -ct          | C2          | -22.39; 157.54 / -22.39; 157.54                                                | 6.35 (0.00)      | 71.2                  | 72.4                |
| <b>1D</b> -cc          | C2          | 23.54; 29.34 / 23.54; 29.34                                                    | 7.30 (0.95)      | 14.3                  | 14.5                |
| <b>1D</b> -tt-ct       | C1          | 143.20; -154.58 / -26.67; 156.73                                               | 7.36 (1.01)      | 12.8                  | 13.1                |
| <b>1D</b> -tc          | C1          | 28.07; -30.28 / -144.34; -29.81                                                | 8.58 (2.23)      | 1.7                   | –                   |
| <b>2D</b> -ct          | CS*         | -1.83; -157.35 / 1.75; 157.36                                                  | 0.00             | 98.6                  | 100.0               |
| <b>2D</b> -cc          | C2          | 3.08; -27.66 / 3.08; -27.66                                                    | 2.55             | 1.3                   | –                   |
| <b>2D</b> -tt          | C2*         | 176.02; -156.79 / 176.02; -156.80                                              | 4.19             | 0.1                   | –                   |
| <b>2D</b> -tc          | C1          | -179.79; -28.43 / 175.93; 29.36                                                | 6.03             | 0.004                 | –                   |
| <b>1E</b> -ct(t)       | C2          | -21.08; 163.14; (-179.52) / -21.08; 163.14; (-179.52)                          | 4.71 (0.00)      | 87.6                  | 91.9                |
| <b>1E</b> -tt(t)       | C1          | -25.36; 160.74; (-178.97) / 143.71; -157.64; (179.39)                          | 6.15 (1.44)      | 7.7                   | 8.1                 |
| <b>1E</b> -cc(t)       | C2          | 22.51; 27.30; (179.57) / 22.51; 27.30; (179.57)                                | 6.80 (2.08)      | 2.6                   | –                   |
| <b>1E</b> -ct(c)       | C2          | -21.11; 162.55; (-2.29) / -21.11; 1622.55; (-2.29)                             | 7.20 (2.49)      | 1.3                   | –                   |
| <b>1E</b> -cc(c)       | C2          | 21.64; 25.06; (-0.20) / 21.64; 25.06; (-0.20)                                  | 7.75 (3.03)      | 0.5                   | –                   |
| <b>1E</b> -ct(c)-tt(c) | C1          | 143.58; -158.52; (2.05) / -25.19; 160.81; (-1.74)                              | 8.36 (3.65)      | 0.2                   | –                   |
| <b>2E</b> -ct(t)       | C2*         | 1.96; -160.59; (179.50) / 1.96; -160.60; (179.49)                              | 0.00             | 72.9                  | 74.0                |
| <b>2E</b> -ct(c)       | CS*         | -1.36; -163.48; (0.99) / 1.36; 163.48; (-0.99)                                 | 0.81             | 18.7                  | 19.0                |
| <b>2E</b> -cc(t)       | C2          | 2.34; -24.99; (-179.44) / 2.34; -24.99; (-179.44)                              | 1.39             | 6.9                   | 7.0                 |
| <b>2E</b> -tt(t)       | C2          | 176.67; -160.04; (179.75) / 176.67; -160.04; (179.75)                          | 2.50             | 1.1                   | –                   |
| <b>2E</b> -cc(c)       | C2*         | -1.43; -24.88; (-3.00) / -1.43; -24.88; (-3.00)                                | 3.27             | 0.3                   | –                   |
| <b>2E</b> -tt(c)       | C2          | 177.42; -159.97; (2.54) / 177.42; -159.97; (2.54)                              | 5.20             | 0.01                  | –                   |

<sup>(1)</sup> Relative Gibbs energies are given considering the conformers of both families. Relative energy values calculated considering only Family 1 are given in parenthesis.

\* Symmetry is not exactly fulfilled, but it presents a deviation lower than 0.01Å in Equation S4.

<sup>(2)</sup> Probability value exceptionally computed as the sum of the probabilities of the two cis isomers (2B-c and 2B-c'), which are isoenergetic in terms of electronic energy.

that operation to the closest atom of the same type ( $B_j^i$ ). The numerator is the distance that the generated atom lies from one of its symmetry-equivalent counterparts. The denominator  $r_j$  is the perpendicular distance between the atom  $A_j$  and the symmetry element, and it serves to keep the error independent of the molecule's size.  $n$  is the order of the symmetry element.

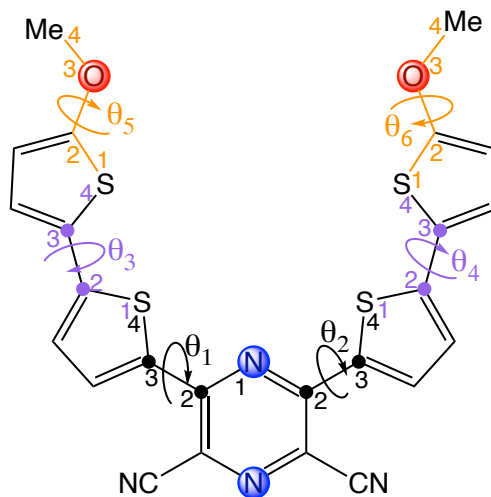

Figure S6: **2E** compound holding the definition of the dihedral angles used in [Table S1](#).

# S4 Absorption properties and characterization of the excited states

## excited states

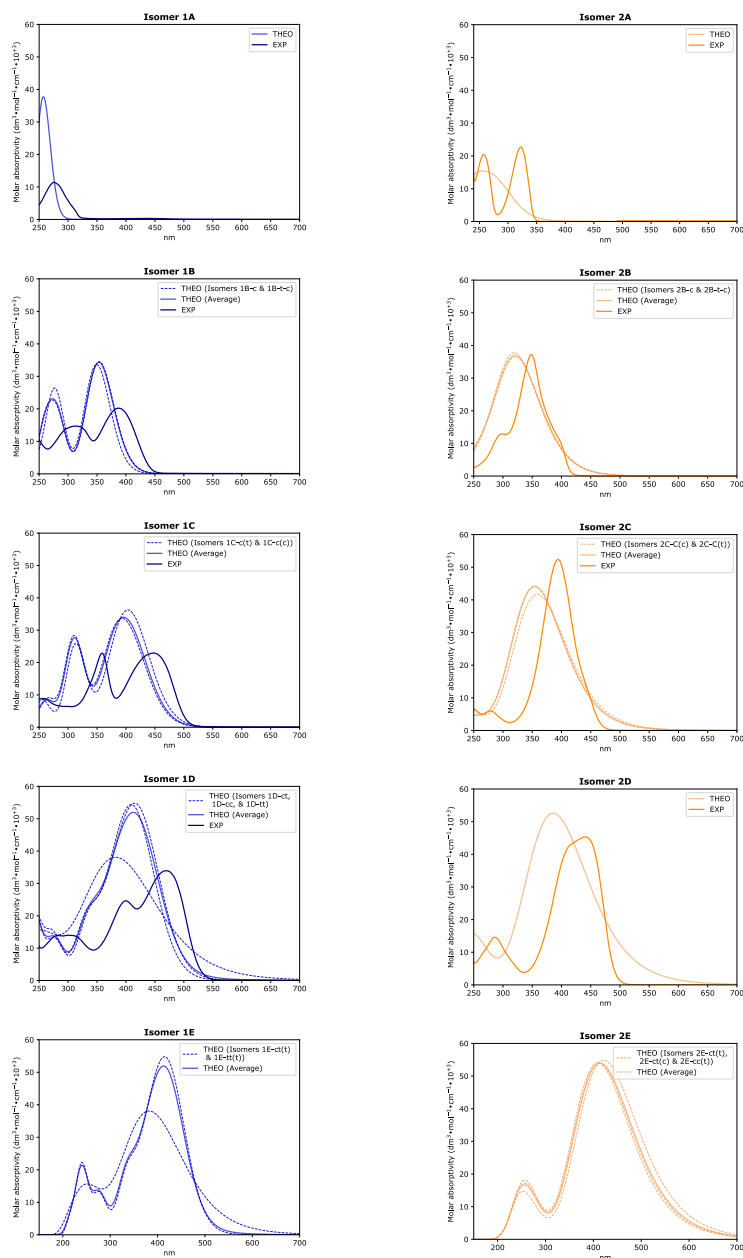

Figure S7: Experimental and computed UV-Vis spectra of 2,3- (left) and 2,6- (right) isomers. Theoretical results were obtained at the IEF-PCM/M06-2X(D3)/6-311+G(d) level of theory in chloroform and using a Gaussian broadening of the absorption peaks with a half-width at half-maximum (HWHM) of 0.25 eV.

Table S2: Wavelengths ( $\lambda_{ge}$ , nm), energies ( $\Delta E_{ge}$ , eV), squared transition dipoles ( $\mu_{ge}^2$ , a.u.<sup>2</sup>), oscillator strengths ( $f_{ge}$ ), dipole moment differences ( $\Delta\mu_{ge}$ , a.u.), and weights of the main electronic excitations (>5%) computed at the IEF-PCM/M06-2X/6-311G(d) level in chloroform for the lowest-energy optical transitions of the various conformers populated at room temperature.

| Comp.          | Transition            | $\lambda_{ge}$ | $\Delta E_{ge}$ | $\mu_{ge}^2$ | $f_{ge}$ | $\Delta\mu_{ge}$ | Electronic excitations              |
|----------------|-----------------------|----------------|-----------------|--------------|----------|------------------|-------------------------------------|
| <b>1A-(c)</b>  | $S_0 \rightarrow S_1$ | 259            | 4.79            | 3.40         | 0.398    | 3.865            | 98% H→L                             |
|                | $S_0 \rightarrow S_2$ | 255            | 4.86            | 2.60         | 0.310    | 0.998            | 96% H→L+1                           |
|                | $S_0 \rightarrow S_3$ | 239            | 5.19            | 0.02         | 0.002    | 0.746            | 96% H-1→L+1                         |
| <b>2A-(c)</b>  | $S_0 \rightarrow S_1$ | 280            | 4.43            | 3.77         | 0.409    | 0.836            | 97% H→L                             |
|                | $S_0 \rightarrow S_2$ | 264            | 4.69            | 0.02         | 0.003    | 0.656            | 87% H-1→L, 8% H-4→L                 |
|                | $S_0 \rightarrow S_3$ | 239            | 5.18            | 3.42         | 0.435    | 0.223            | 96% H→L+1                           |
| <b>1B-c</b>    | $S_0 \rightarrow S_1$ | 363            | 3.41            | 4.21         | 0.352    | 5.829            | 96% H→L                             |
|                | $S_0 \rightarrow S_2$ | 345            | 3.60            | 3.99         | 0.352    | 5.671            | 97% H→L+1                           |
|                | $S_0 \rightarrow S_3$ | 297            | 4.18            | 0.07         | 0.007    | 0.600            | 71% H-4→L+1, 17% H-3→L+1            |
|                | $S_0 \rightarrow S_4$ | 284            | 4.37            | 1.92         | 0.205    | 5.949            | 62% H-1→L, 17% H-4→L                |
| <b>1B-t-c</b>  | $S_0 \rightarrow S_1$ | 357            | 3.48            | 3.60         | 0.307    | 6.398            | 94% H→L                             |
|                | $S_0 \rightarrow S_2$ | 343            | 3.61            | 3.95         | 0.349    | 6.218            | 96% H→L+1                           |
|                | $S_0 \rightarrow S_3$ | 298            | 4.17            | 0.07         | 0.007    | 0.702            | 72% H-4→L+1, 7% H-3→L+1, 6% H-2→L+1 |
| <b>2B-c</b>    | $S_0 \rightarrow S_1$ | 330            | 3.76            | 5.93         | 0.546    | 2.490            | 94% H→L+1                           |
|                | $S_0 \rightarrow S_2$ | 325            | 3.82            | 5.64         | 0.528    | 2.485            | 92% H→L                             |
|                | $S_0 \rightarrow S_3$ | 311            | 3.99            | 2.59         | 0.253    | 5.755            | 89% H-1→L                           |
| <b>2B-t-c</b>  | $S_0 \rightarrow S_1$ | 330            | 3.76            | 5.93         | 0.546    | 2.443            | 95% H→L+1                           |
|                | $S_0 \rightarrow S_2$ | 322            | 3.85            | 5.14         | 0.486    | 2.437            | 90% H→L, 5% H-1→L+1                 |
|                | $S_0 \rightarrow S_3$ | 308            | 4.02            | 3.71         | 0.366    | 5.438            | 91% H-1→L                           |
| <b>1C-c(t)</b> | $S_0 \rightarrow S_1$ | 412            | 3.01            | 5.32         | 0.392    | 6.193            | 95% H→L                             |
|                | $S_0 \rightarrow S_2$ | 376            | 3.30            | 4.80         | 0.388    | 6.122            | 97% H→L+1                           |
|                | $S_0 \rightarrow S_3$ | 311            | 3.98            | 4.76         | 0.464    | 7.138            | 92% H-1→L                           |
| <b>1C-c(c)</b> | $S_0 \rightarrow S_1$ | 417            | 2.97            | 6.22         | 0.453    | 5.795            | 95% H→L                             |
|                | $S_0 \rightarrow S_2$ | 384            | 3.23            | 4.41         | 0.349    | 5.696            | 97% H→L+1                           |
|                | $S_0 \rightarrow S_3$ | 315            | 3.94            | 4.26         | 0.412    | 6.639            | 93% H-1→L                           |
| <b>2C-c(t)</b> | $S_0 \rightarrow S_1$ | 358            | 3.47            | 10.88        | 0.924    | 3.587            | 81% H→L+1, 15% H-1→L                |
|                | $S_0 \rightarrow S_2$ | 353            | 3.51            | 6.27         | 0.539    | 3.142            | 94% H→L                             |
|                | $S_0 \rightarrow S_3$ | 345            | 3.60            | 1.88         | 0.166    | 6.201            | 78% H-1→L, 16% H→L+1                |
| <b>2C-c(c)</b> | $S_0 \rightarrow S_1$ | 364            | 3.41            | 9.58         | 0.799    | 3.573            | 79% H→L+1, 17% H-1→L                |
|                | $S_0 \rightarrow S_2$ | 355            | 3.49            | 7.24         | 0.619    | 2.969            | 92% H→L                             |
|                | $S_0 \rightarrow S_3$ | 349            | 3.56            | 1.40         | 0.122    | 6.168            | 76% H-1→L, 18% H→L+1                |
| <b>1D-ct</b>   | $S_0 \rightarrow S_1$ | 430            | 2.88            | 10.83        | 0.765    | 7.080            | 91% H→L                             |
|                | $S_0 \rightarrow S_2$ | 388            | 3.19            | 6.88         | 0.539    | 7.310            | 91% H→L+1                           |
|                | $S_0 \rightarrow S_3$ | 344            | 3.60            | 3.08         | 0.272    | 9.270            | 89% H-1→L                           |
|                | $S_0 \rightarrow S_4$ | 327            | 3.79            | 1.48         | 0.138    | 10.207           | 80% H-1→L+1, 5% H-7→L+1             |
| <b>1D-cc</b>   | $S_0 \rightarrow S_1$ | 423            | 2.93            | 10.48        | 0.752    | 7.160            | 90% H→L                             |
|                | $S_0 \rightarrow S_2$ | 384            | 3.23            | 6.49         | 0.513    | 7.364            | 91% H→L+1                           |
|                | $S_0 \rightarrow S_3$ | 340            | 3.65            | 3.01         | 0.269    | 9.366            | 89% H-1→L                           |

Table S2: continuation...

| Comp.           | Transition            | $\lambda_{ge}$ | $\Delta E_{ge}$ | $\mu_{ge}^2$ | $f_{ge}$ | $\Delta\mu_{ge}$ | Electronic excitations                                                        |
|-----------------|-----------------------|----------------|-----------------|--------------|----------|------------------|-------------------------------------------------------------------------------|
| <b>1D-tt-ct</b> | $S_0 \rightarrow S_4$ | 324            | 3.83            | 1.45         | 0.138    | 10.125           | 79% H-1 $\rightarrow$ L+1, 6% H-7 $\rightarrow$ L+1, 6% H-8 $\rightarrow$ L+1 |
|                 | $S_0 \rightarrow S_1$ | 419            | 2.96            | 7.87         | 0.571    | 7.941            | 90% H $\rightarrow$ L                                                         |
|                 | $S_0 \rightarrow S_2$ | 383            | 3.24            | 7.78         | 0.617    | 8.663            | 91% H $\rightarrow$ L+1                                                       |
|                 | $S_0 \rightarrow S_3$ | 343            | 3.61            | 5.02         | 0.444    | 10.483           | 90% H-1 $\rightarrow$ L                                                       |
|                 | $S_0 \rightarrow S_4$ | 327            | 3.79            | 0.61         | 0.056    | 12.304           | 82% H-1 $\rightarrow$ L+1                                                     |
| <b>2D-ct</b>    | $S_0 \rightarrow S_1$ | 395            | 3.14            | 12.48        | 0.960    | 6.748            | 51% H-1 $\rightarrow$ L, 41% H $\rightarrow$ L+1                              |
|                 | $S_0 \rightarrow S_2$ | 379            | 3.27            | 12.43        | 0.988    | 5.732            | 85% H $\rightarrow$ L, 9% H-1 $\rightarrow$ L+1                               |
|                 | $S_0 \rightarrow S_3$ | 359            | 3.46            | 0.04         | 0.004    | 8.005            | 50% H $\rightarrow$ L+1, 39% H-1 $\rightarrow$ L                              |
| <b>1E-ct(t)</b> | $S_0 \rightarrow S_1$ | 462            | 2.68            | 13.26        | 0.871    | 8.029            | 88% H $\rightarrow$ L                                                         |
|                 | $S_0 \rightarrow S_2$ | 410            | 3.02            | 8.13         | 0.602    | 8.061            | 87% H $\rightarrow$ L+1                                                       |
|                 | $S_0 \rightarrow S_3$ | 373            | 3.32            | 2.23         | 0.181    | 10.595           | 87% H-1 $\rightarrow$ L                                                       |
|                 | $S_0 \rightarrow S_4$ | 352            | 3.52            | 1.87         | 0.161    | 11.850           | 83% H-1 $\rightarrow$ L+1, 5% H $\rightarrow$ L                               |
| <b>1E-tt(t)</b> | $S_0 \rightarrow S_1$ | 447            | 2.77            | 9.24         | 0.627    | 9.425            | 87% H $\rightarrow$ L, 5% H-1 $\rightarrow$ L+1                               |
|                 | $S_0 \rightarrow S_2$ | 403            | 3.08            | 9.82         | 0.740    | 9.895            | 86% H $\rightarrow$ L+1                                                       |
|                 | $S_0 \rightarrow S_3$ | 372            | 3.34            | 4.30         | 0.352    | 12.437           | 87% H-1 $\rightarrow$ L                                                       |
|                 | $S_0 \rightarrow S_4$ | 350            | 3.54            | 0.65         | 0.056    | 14.636           | 84% H-1 $\rightarrow$ L+1, 6% H $\rightarrow$ L                               |
| <b>2E-ct(t)</b> | $S_0 \rightarrow S_1$ | 427            | 2.91            | 12.82        | 0.913    | 8.920            | 58% H-1 $\rightarrow$ L, 33% H $\rightarrow$ L+1                              |
|                 | $S_0 \rightarrow S_2$ | 404            | 3.07            | 14.33        | 1.078    | 7.702            | 82% H $\rightarrow$ L, 11% H-1 $\rightarrow$ L+1                              |
|                 | $S_0 \rightarrow S_3$ | 378            | 3.28            | 0.23         | 0.018    | 9.681            | 57% H $\rightarrow$ L+1, 32% H-1 $\rightarrow$ L                              |
|                 | $S_0 \rightarrow S_4$ | 353            | 3.51            | 0.66         | 0.057    | 11.805           | 83% H-1 $\rightarrow$ L+1, 11% H $\rightarrow$ L                              |
| <b>2E-ct(c)</b> | $S_0 \rightarrow S_1$ | 436            | 2.84            | 14.14        | 0.985    | 8.807            | 60% H-1 $\rightarrow$ L, 32% H $\rightarrow$ L+1                              |
|                 | $S_0 \rightarrow S_2$ | 411            | 3.01            | 14.17        | 1.046    | 7.519            | 82% H $\rightarrow$ L, 11% H-1 $\rightarrow$ L+1                              |
|                 | $S_0 \rightarrow S_3$ | 384            | 3.23            | 0.27         | 0.021    | 9.674            | 59% H $\rightarrow$ L+1, 31% H-1 $\rightarrow$ L                              |
|                 | $S_0 \rightarrow S_4$ | 359            | 3.45            | 0.63         | 0.053    | 11.633           | 83% H-1 $\rightarrow$ L+1, 11% H $\rightarrow$ L                              |
| <b>2E-cc(t)</b> | $S_0 \rightarrow S_1$ | 424            | 2.93            | 12.50        | 0.896    | 9.136            | 58% H-1 $\rightarrow$ L, 33% H $\rightarrow$ L+1                              |
|                 | $S_0 \rightarrow S_2$ | 401            | 3.09            | 14.61        | 1.108    | 7.810            | 81% H $\rightarrow$ L, 11% H-1 $\rightarrow$ L+1                              |
|                 | $S_0 \rightarrow S_3$ | 376            | 3.29            | 0.20         | 0.017    | 9.750            | 57% H $\rightarrow$ L+1, 32% H-1 $\rightarrow$ L                              |
|                 | $S_0 \rightarrow S_4$ | 351            | 3.53            | 0.57         | 0.049    | 12.116           | 83% H-1 $\rightarrow$ L+1, 11% H $\rightarrow$ L                              |

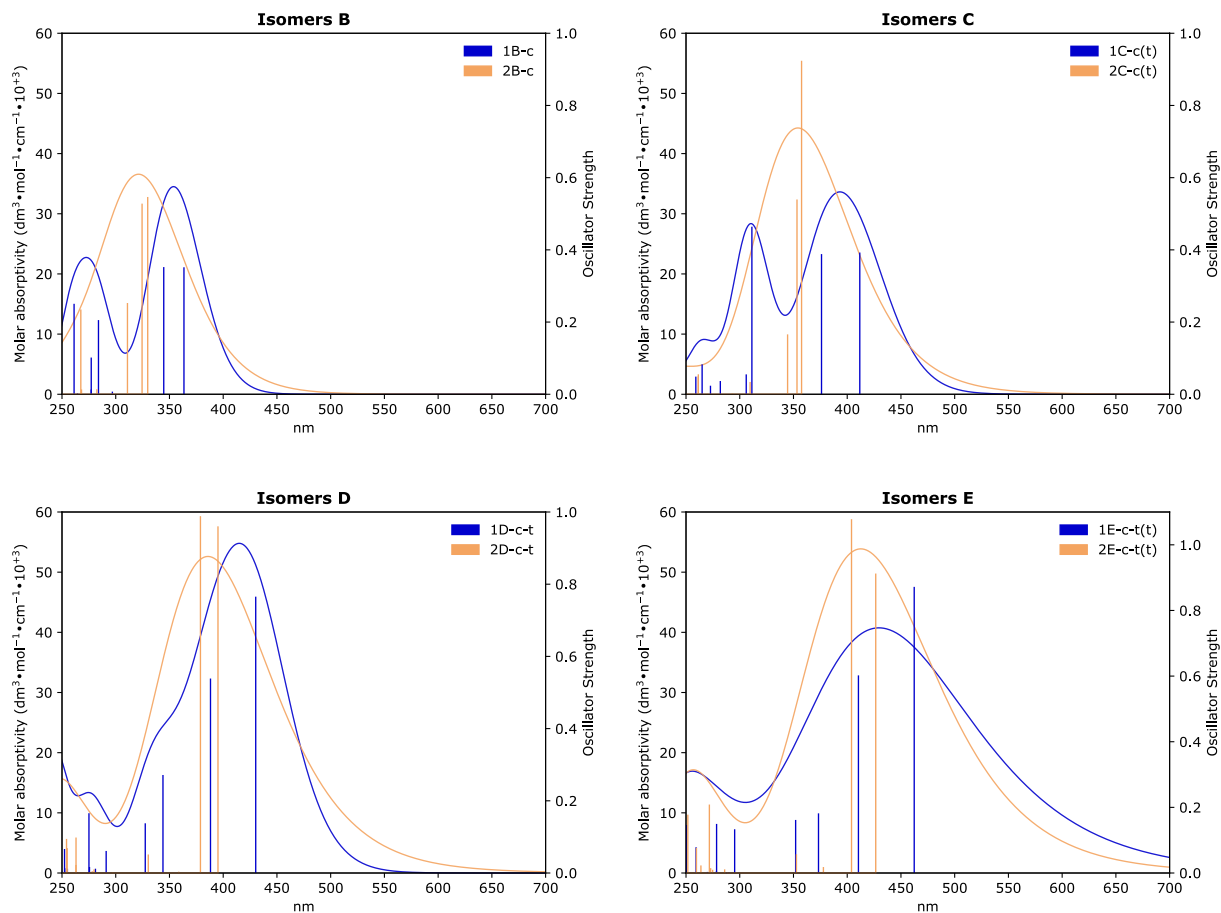

Figure S8: Calculated UV-vis spectra of the most stable conformers of Family 1 (blue) and Family 2 (orange) for isomers **B**, **C**, **D**, and **E**, as obtained at the IEF-PCM/M06-2X(D3)/6-311+G(d) level of theory in chloroform and using a Gaussian broadening of the absorption peaks (shown with the associated oscillator strengths) with a half-width at half-maximum (HWHM) of 0.25 eV.

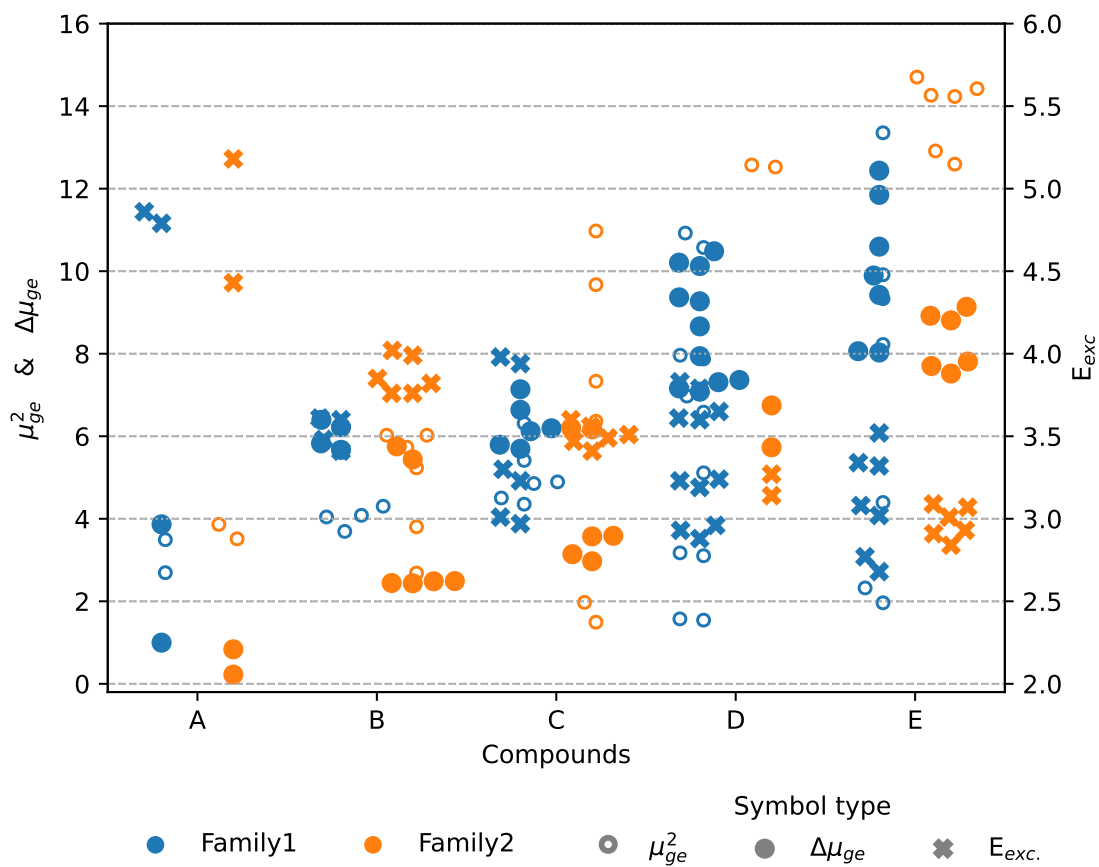

Figure S9: Summary-figure of the linear optical properties of the stable conformers for the two families of chromophores: squared transition dipoles ( $\mu_{ge}^2$ , a.u.<sup>2</sup>, empty circles), dipole moment differences ( $\Delta\vec{\mu}_{ge}$ , a.u., filled circles), and excitation energies ( $E_{exc}$ , eV, cross marks). The two families of compounds are distinguished by the color code.



## S4.1 Rationalization of the different energy splitting between $S_0 \rightarrow S_1$ and $S_0 \rightarrow S_2$ transitions for the two families of compounds

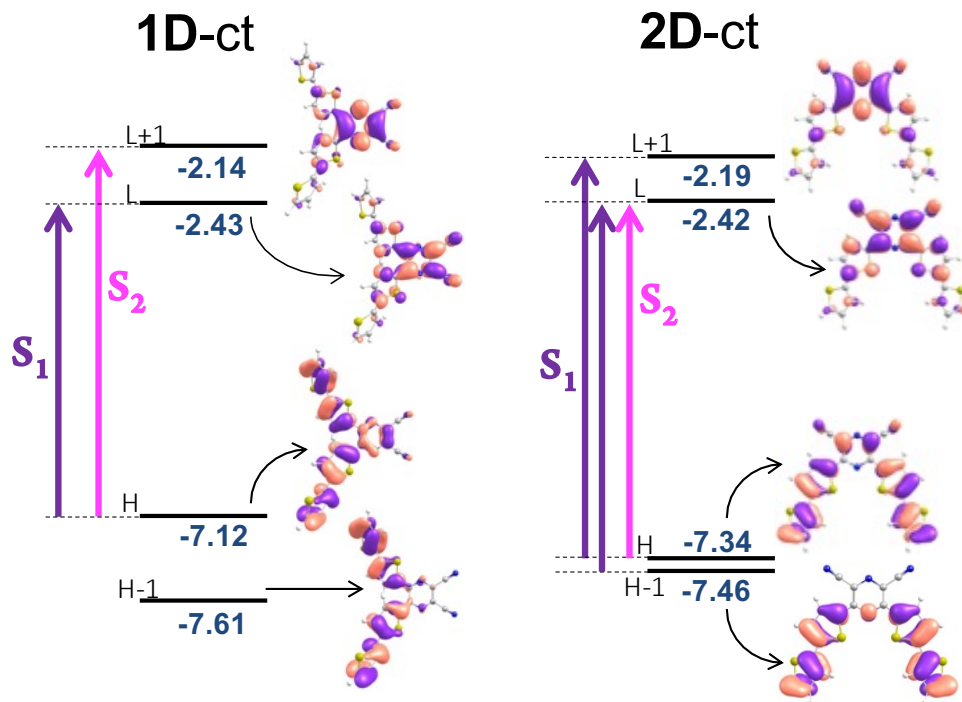

Figure S10: MO diagrams of isomers **1D-ct** and **2D-ct**. The main excitations that characterize the  $S_0 \rightarrow S_1$  and  $S_0 \rightarrow S_2$  transitions are represented in purple and pink, respectively. See [Table S2](#) for further details. MO energies in eV.

Molecular orbital (MO) energies and gaps can be used to rationalize the higher splitting between the  $S_0 \rightarrow S_1$  and  $S_0 \rightarrow S_2$  electronic transitions observed for Family1 (see [Figure S8](#)). As it can be seen in [Figure S10](#), the higher occupied orbitals (H and H-1) mainly involve the branches of the donor (D) substituents, and their energy gap can be directly related to the D-D interactions. Whereas, L and L+1 mainly involve the pyrazine, and their energy gap can be directly related to the substituents' and Ns' pattern within the pyrazine ring.

If we compare the main excitations that characterize the  $S_0 \rightarrow S_1$  and  $S_0 \rightarrow S_2$  transitions for each isomer, we can conclude that the energy gap between these electronic transitions will be mainly dictated by the L / L+1 and H / H-1 energy differences. For Family2, here exemplified with isomer **2D-ct**, these energy gaps are smaller than for Family1. This is

specially evident for the H / H-1 gap, indicating that there is a lower interaction between D groups, but also for the L / L+1 gap, which accounts for a different pattern in the pyrazine ring.

## S5 NLO properties

### S5.1 Expression of the $\langle \beta_{ZZZ}^2 \rangle$ and $\langle \beta_{ZXX}^2 \rangle$ invariants

The  $\langle \beta_{ZZZ}^2 \rangle$  and  $\langle \beta_{ZXX}^2 \rangle$  invariants (equations 5 and 6) have been calculated using the molecular  $\beta$  tensor components as follows:

$$\begin{aligned}
\langle \beta_{ZZZ}^2 \rangle &= \frac{1}{7} \sum_{\zeta}^{x,y,z} \beta_{\zeta\zeta\zeta}^2 + \frac{4}{35} \sum_{\zeta \neq \eta}^{x,y,z} \beta_{\zeta\zeta\eta}^2 + \frac{2}{35} \sum_{\zeta \neq \eta}^{x,y,z} \beta_{\zeta\zeta\zeta} \beta_{\zeta\eta\eta} \\
&+ \frac{4}{35} \sum_{\zeta \neq \eta}^{x,y,z} \beta_{\eta\zeta\zeta} \beta_{\zeta\zeta\eta} + \frac{4}{35} \sum_{\zeta \neq \eta}^{x,y,z} \beta_{\zeta\zeta\zeta} \beta_{\eta\eta\zeta} + \frac{1}{35} \sum_{\zeta \neq \eta}^{x,y,z} \beta_{\eta\zeta\zeta}^2 \\
&+ \frac{4}{105} \sum_{\zeta \neq \eta \neq \xi}^{x,y,z} \beta_{\zeta\zeta\eta} \beta_{\eta\xi\xi} + \frac{1}{105} \sum_{\zeta \neq \eta \neq \xi}^{x,y,z} \beta_{\eta\zeta\zeta} \beta_{\eta\xi\xi} \\
&+ \frac{4}{105} \sum_{\zeta \neq \eta \neq \xi}^{x,y,z} \beta_{\zeta\zeta\eta} \beta_{\xi\xi\eta} \\
&+ \frac{2}{105} \sum_{\zeta \neq \eta \neq \xi}^{x,y,z} \beta_{\zeta\eta\xi}^2 + \frac{4}{105} \sum_{\zeta \neq \eta \neq \xi}^{x,y,z} \beta_{\zeta\eta\xi} \beta_{\eta\zeta\xi}
\end{aligned} \tag{S5}$$

$$\begin{aligned}
\langle \beta_{ZXX}^2 \rangle &= \frac{1}{35} \sum_{\zeta}^{x,y,z} \beta_{\zeta\zeta\zeta}^2 + \frac{4}{105} \sum_{\zeta \neq \eta}^{x,y,z} \beta_{\zeta\zeta\zeta} \beta_{\zeta\eta\eta} - \frac{2}{35} \sum_{\zeta \neq \eta}^{x,y,z} \beta_{\zeta\zeta\zeta} \beta_{\eta\eta\zeta} \\
&+ \frac{8}{105} \sum_{\zeta \neq \eta}^{x,y,z} \beta_{\zeta\zeta\eta}^2 + \frac{3}{35} \sum_{\zeta \neq \eta}^{x,y,z} \beta_{\zeta\eta\eta}^2 - \frac{2}{35} \sum_{\zeta \neq \eta}^{x,y,z} \beta_{\zeta\zeta\eta} \beta_{\eta\zeta\zeta} \\
&+ \frac{1}{35} \sum_{\zeta \neq \eta \neq \xi}^{x,y,z} \beta_{\zeta\eta\eta} \beta_{\zeta\xi\xi} - \frac{2}{105} \sum_{\zeta \neq \eta \neq \xi}^{x,y,z} \beta_{\zeta\zeta\xi} \beta_{\eta\eta\xi} \\
&- \frac{2}{105} \sum_{\zeta \neq \eta \neq \xi}^{x,y,z} \beta_{\zeta\zeta\eta} \beta_{\eta\xi\xi} \\
&+ \frac{2}{35} \sum_{\zeta \neq \eta \neq \xi}^{x,y,z} \beta_{\zeta\eta\xi}^2 - \frac{2}{105} \sum_{\zeta \neq \eta \neq \xi}^{x,y,z} \beta_{\zeta\eta\xi} \beta_{\eta\zeta\xi}
\end{aligned} \tag{S6}$$

## S5.2 Hyper-Rayleigh Scattering data calculated in dichloromethane

Table S3: Static and dynamic Hyper-Rayleigh Scattering (HRS) data calculated at the IEF-PCM/M06-2X(D3)/6-311+G(d) level of theory in dichloromethane: first hyperpolarizability ( $\beta_{HRS}$ ) and depolarization ratio (DR), and their analogs  $\beta_{HRS}(C_{2v})$  and  $DR(C_{2v})$  calculated using equations 8 and 9, respectively, considering an exact  $C_{2v}$  symmetry. The deviation of  $\beta_{HRS}(C_{2v})$  and  $DR(C_{2v})$  with respect to the full value is given in parenthesis. All  $\beta$  values are expressed in a.u.

| Compounds        | Static ( $\lambda = \infty$ ) |      |                       |              | Dynamic ( $\lambda = 1064$ nm) |      |
|------------------|-------------------------------|------|-----------------------|--------------|--------------------------------|------|
|                  | $\beta_{HRS}$                 | DR   | $\beta_{HRS}(C_{2v})$ | $DR(C_{2v})$ | $\beta_{HRS}$                  | DR   |
| <b>1A</b> -(c)   | 614                           | 4.78 | 613 (-0.3%)           | 4.72 (-1.3%) | 548                            | 4.94 |
| <b>2A</b> -(c)   | 686                           | 2.32 | 691 (+0.7%)           | 2.39 (+3.0%) | 617                            | 2.40 |
| <b>1B</b> -c     | 2936                          | 5.53 | 2959 (+0.8%)          | 5.74 (+3.8%) | 3650                           | 6.84 |
| <b>2B</b> -c     | 3064                          | 2.97 | 3084 (+0.7%)          | 3.07 (+3.4%) | 3507                           | 3.09 |
| <b>1C</b> -c(t)  | 6109                          | 5.21 | 6125 (+0.3%)          | 5.30 (+1.7%) | 9291                           | 6.18 |
| <b>2C</b> -c(t)  | 6388                          | 3.22 | 6392 (+0.1%)          | 3.24 (+0.6%) | 8484                           | 3.32 |
| <b>1D</b> -ct    | 9442                          | 4.51 | 9415 (-0.3%)          | 4.57 (+1.3%) | 20016                          | 4.83 |
| <b>1D</b> -cc    | 8942                          | 4.55 | 8962 (+0.2%)          | 4.61 (+1.3%) | 18029                          | 4.89 |
| <b>2D</b> -ct    | 10672                         | 3.98 | 10697 (+0.2%)         | 4.03 (+1.3%) | 19420                          | 4.10 |
| <b>1E</b> -ct(t) | 16062                         | 4.15 | 15562 (-3.11%)        | 4.25 (+2.4%) | 47804                          | 4.10 |
| <b>1E</b> -tt(t) | 15265                         | 5.58 | 13635 (-10.7%)        | 5.84 (+4.7%) | 36966                          | 6.04 |
| <b>2E</b> -ct(t) | 17574                         | 4.49 | 17593 (+0.1%)         | 4.52 (+0.7%) | 40618                          | 4.60 |
| <b>2E</b> -ct(c) | 19925                         | 4.31 | 19919 (-0.03%)        | 4.32 (+0.2%) | 49247                          | 4.39 |
| <b>2E</b> -cc(t) | 17299                         | 4.78 | 17315 (+0.1%)         | 4.81 (+0.6%) | 38531                          | 4.86 |

### S5.3 Static $\beta_{zxx}$ and $\beta_{zzz}$ components calculated with Coupled-Perturbed Kohn-Sham

Table S4: Static  $\beta_{zxx}$  and  $\beta_{zzz}$  components (a.u.) and  $R$  ratios calculated at the IEF-PCM/M06-2X/6-311+G(d) level in chloroform.

| Compound        | $\beta_{zxx}$ | $\beta_{zzz}$ | R     |
|-----------------|---------------|---------------|-------|
| <b>1A-(c)</b>   | 664           | 586           | 1.13  |
| <b>2A-(c)</b>   | 996           | 42            | 23.93 |
| <b>1B-c</b>     | 2656          | 3594          | 0.74  |
| <b>1B-t-c</b>   | 2296          | 3627          | 0.63  |
| <b>2B-c</b>     | 4152          | 1094          | 3.80  |
| <b>2B-t-c</b>   | 4149          | 874           | 4.75  |
| <b>1C-c(t)</b>  | 6005          | 6658          | 0.90  |
| <b>1C-c(c)</b>  | 6789          | 6294          | 1.08  |
| <b>2C-c(t)</b>  | 8366          | 2788          | 3.00  |
| <b>2C-c(c)</b>  | 8193          | 3306          | 2.48  |
| <b>1D-ct</b>    | 10630         | 8472          | 1.25  |
| <b>1D-cc</b>    | 9999          | 8140          | 1.23  |
| <b>1D-tt-ct</b> | 8230          | 10718         | 0.77  |
| <b>2D-ct</b>    | 12878         | 7841          | 1.64  |
| <b>1E-ct(t)</b> | 18398         | 12525         | 1.47  |
| <b>1E-tt(t)</b> | 12417         | 17345         | 0.72  |
| <b>2E-ct(t)</b> | 19776         | 15590         | 1.27  |
| <b>2E-ct(c)</b> | 23064         | 16361         | 1.41  |
| <b>2E-cc(t)</b> | 18503         | 16699         | 1.11  |

### S5.4 Derivation of the SOS expression of $\beta_{zxx}$ and $\beta_{zzz}$

The general formula for calculating  $\beta$  by means of the SOS method is:

$$\begin{aligned}
\beta_{ijk}(-(\omega_1 + \omega_2); \omega_1, \omega_2) = & \\
\sum_{e, e' \neq 0} \left[ \frac{\langle 0 | \tilde{\mu}_i | e \rangle \langle e | \tilde{\mu}_j | e' \rangle \langle e' | \tilde{\mu}_k | 0 \rangle}{(\Delta E_{ge} - \hbar(\omega_1 + \omega_2))(\Delta E_{ge'} - \hbar\omega_2)} + \frac{\langle 0 | \tilde{\mu}_i | e \rangle \langle e | \tilde{\mu}_k | e' \rangle \langle e' | \tilde{\mu}_j | 0 \rangle}{\Delta E_{ge} - \hbar(\omega_1 + \omega_2)(\Delta E_{ge'} - \hbar\omega_1)} + \right. & \\
\frac{\langle 0 | \tilde{\mu}_j | e \rangle \langle e | \tilde{\mu}_i | e' \rangle \langle e' | \tilde{\mu}_k | 0 \rangle}{(\Delta E_{ge} + \hbar\omega_1)(\Delta E_{ge'} - \hbar\omega_2)} + \frac{\langle 0 | \tilde{\mu}_j | e \rangle \langle e | \tilde{\mu}_k | e' \rangle \langle e' | \tilde{\mu}_i | 0 \rangle}{(\Delta E_{ge} + \hbar\omega_1)(\Delta E_{ge'} + \hbar(\omega_1 + \omega_2))} + & \\
\frac{\langle 0 | \tilde{\mu}_k | e \rangle \langle e | \tilde{\mu}_i | e' \rangle \langle e' | \tilde{\mu}_j | 0 \rangle}{(\Delta E_{ge} + \hbar\omega_2)(\Delta E_{ge'} - \hbar\omega_1)} + & \\
\left. \frac{\langle 0 | \tilde{\mu}_k | e \rangle \langle e | \tilde{\mu}_j | e' \rangle \langle e' | \tilde{\mu}_i | 0 \rangle}{(\Delta E_{ge} + \hbar\omega_2)(\Delta E_{ge'} + \hbar(\omega_1 + \omega_2))} \right] & \quad (S7)
\end{aligned}$$

where 0 refers to the ground state,  $e$  and  $e'$  account for excited states, and  $\tilde{\mu}_i = \hat{\mu}_i - \langle 0 | \hat{\mu}_i | 0 \rangle$ .

Considering:

- Static regime.
- The following simplification on  $\tilde{\mu}_i$  that can be done in numerators:

$$\begin{aligned}
& \langle 0 | \hat{\mu}_i - \langle 0 | \hat{\mu}_i | 0 \rangle | e \rangle \langle e | \hat{\mu}_j - \langle 0 | \hat{\mu}_j | 0 \rangle | e' \rangle \langle e' | \hat{\mu}_k - \langle 0 | \hat{\mu}_k | 0 \rangle | 0 \rangle = \\
& (\langle 0 | \hat{\mu}_i | e \rangle - \langle 0 | \hat{\mu}_i | 0 \rangle \langle 0 | e \rangle) (\langle e | \hat{\mu}_j | e' \rangle - \langle 0 | \hat{\mu}_j | 0 \rangle \langle e | e' \rangle) (\langle e' | \hat{\mu}_k | 0 \rangle - \langle 0 | \hat{\mu}_k | 0 \rangle \langle e' | 0 \rangle) = \\
& (\langle 0 | \hat{\mu}_i | e \rangle) (\langle e | \hat{\mu}_j | e' \rangle - \delta_{ee'} \langle 0 | \hat{\mu}_j | 0 \rangle) (\langle e' | \hat{\mu}_k | 0 \rangle)
\end{aligned}$$

eq. S7 can be rewritten as:

$$\begin{aligned}
\beta_{ijk}(0; 0, 0) = & \\
\sum_{e \neq 0} \sum_{e' \neq 0} \frac{\langle 0 | \hat{\mu}_i | e \rangle (\langle e | \hat{\mu}_j | e' \rangle - \delta_{ee'} \langle 0 | \hat{\mu}_j | 0 \rangle) \langle e' | \hat{\mu}_k | 0 \rangle}{\Delta E_{ge} \Delta E_{ge'}} + \sum_{e \neq 0} \sum_{e' \neq 0} \frac{\langle 0 | \hat{\mu}_i | e \rangle (\langle e | \hat{\mu}_k | e' \rangle - \delta_{ee'} \langle 0 | \hat{\mu}_k | 0 \rangle) \langle e' | \hat{\mu}_j | 0 \rangle}{\Delta E_{ge} \Delta E_{ge'}} + & \\
\sum_{e \neq 0} \sum_{e' \neq 0} \frac{\langle 0 | \hat{\mu}_j | e \rangle (\langle e | \hat{\mu}_i | e' \rangle - \delta_{ee'} \langle 0 | \hat{\mu}_i | 0 \rangle) \langle e' | \hat{\mu}_k | 0 \rangle}{\Delta E_{ge} \Delta E_{ge'}} + \sum_{e \neq 0} \sum_{e' \neq 0} \frac{\langle 0 | \hat{\mu}_j | e \rangle (\langle e | \hat{\mu}_k | e' \rangle - \delta_{ee'} \langle 0 | \hat{\mu}_k | 0 \rangle) \langle e' | \hat{\mu}_i | 0 \rangle}{\Delta E_{ge} \Delta E_{ge'}} + & \\
\sum_{e \neq 0} \sum_{e' \neq 0} \frac{\langle 0 | \hat{\mu}_k | e \rangle (\langle e | \hat{\mu}_i | e' \rangle - \delta_{ee'} \langle 0 | \hat{\mu}_i | 0 \rangle) \langle e' | \hat{\mu}_j | 0 \rangle}{\Delta E_{ge} \Delta E_{ge'}} + & \\
\sum_{e \neq 0} \sum_{e' \neq 0} \frac{\langle 0 | \hat{\mu}_k | e \rangle (\langle e | \hat{\mu}_j | e' \rangle - \delta_{ee'} \langle 0 | \hat{\mu}_j | 0 \rangle) \langle e' | \hat{\mu}_i | 0 \rangle}{\Delta E_{ge} \Delta E_{ge'}} & \quad (S8)
\end{aligned}$$

According to the previous equation, the terms that define  $\beta_{ijk}$  values by means of the SOS formalism can be expressed as an  $[e * e']$  matrix (Figure S11), where we can distinguish diagonal (also called vertical) and off-diagonal (also called cross-terms) elements.

$$\beta_{ijk} (SOS) = \sum_e \begin{pmatrix} 0 & e' \\ \emptyset & \emptyset \\ \emptyset & \emptyset \end{pmatrix}$$

Let's analyze eq. S8, splitting between diagonal and off-diagonal elements:

Figure S11: Matrix representation of the contributions that give  $\beta_{ijk}$  values according the SOS method.

- $e = e'$

$$\begin{aligned} \beta_{ijk}(- (0); 0, 0) = & \\ & \sum_{e \neq 0} \frac{\langle 0 | \hat{\mu}_i | e \rangle (\langle e | \hat{\mu}_j | e \rangle - \langle 0 | \hat{\mu}_j | 0 \rangle) \langle e | \hat{\mu}_k | 0 \rangle}{\Delta E_{ge} \Delta E_{ge}} + \sum_{e \neq 0} \frac{\langle 0 | \hat{\mu}_i | e \rangle (\langle e | \hat{\mu}_k | e \rangle - \langle 0 | \hat{\mu}_k | 0 \rangle) \langle e | \hat{\mu}_j | 0 \rangle}{\Delta E_{ge} \Delta E_{ge}} + \\ & \sum_{e \neq 0} \frac{\langle 0 | \hat{\mu}_j | e \rangle (\langle e | \hat{\mu}_i | e \rangle - \langle 0 | \hat{\mu}_i | 0 \rangle) \langle e | \hat{\mu}_k | 0 \rangle}{\Delta E_{ge} \Delta E_{ge}} + \sum_{e \neq 0} \frac{\langle 0 | \hat{\mu}_j | e \rangle (\langle e | \hat{\mu}_k | e \rangle - \langle 0 | \hat{\mu}_k | 0 \rangle) \langle e | \hat{\mu}_i | 0 \rangle}{\Delta E_{ge} \Delta E_{ge}} + \\ & \sum_{e \neq 0} \frac{\langle 0 | \hat{\mu}_k | e \rangle (\langle e | \hat{\mu}_i | e \rangle - \langle 0 | \hat{\mu}_i | 0 \rangle) \langle e | \hat{\mu}_j | 0 \rangle}{\Delta E_{ge} \Delta E_{ge}} + \sum_{e \neq 0} \frac{\langle 0 | \hat{\mu}_k | e \rangle (\langle e | \hat{\mu}_j | e \rangle - \langle 0 | \hat{\mu}_j | 0 \rangle) \langle e | \hat{\mu}_i | 0 \rangle}{\Delta E_{ge} \Delta E_{ge}} \quad (S9) \end{aligned}$$

$$\begin{aligned} \beta_{ijk}(- (0); 0, 0) = & \\ & 2 \sum_{e \neq 0} \frac{\langle 0 | \hat{\mu}_i | e \rangle \langle e | \hat{\mu}_k | 0 \rangle \Delta \hat{\mu}_j^{0e}}{\Delta E_{ge} \Delta E_{ge}} + 2 \sum_{e \neq 0} \frac{\langle 0 | \hat{\mu}_i | e \rangle \langle e | \hat{\mu}_j | 0 \rangle \Delta \hat{\mu}_k^{0e}}{\Delta E_{ge} \Delta E_{ge}} + 2 \sum_{e \neq 0} \frac{\langle 0 | \hat{\mu}_j | e \rangle \langle e | \hat{\mu}_k | 0 \rangle \Delta \hat{\mu}_i^{0e}}{\Delta E_{ge} \Delta E_{ge}} \quad (S10) \end{aligned}$$

where  $\Delta \hat{\mu}_i^{0e}$  accounts for the difference between permanent dipole moments of the ground state (0) and the excited state ( $e$ ) into  $i$  direction.

- $e \neq e'$

$$\begin{aligned}
\beta_{ijk}(-0); 0, 0) = & \\
& \sum_{\substack{e \neq 0 \\ e}} \sum_{\substack{e' \neq 0 \\ e' \neq e}} \frac{\langle 0 | \hat{\mu}_i | e \rangle \langle e | \hat{\mu}_j | e' \rangle \langle e' | \hat{\mu}_k | 0 \rangle}{\Delta E_{ge} \Delta E_{ge'}} + \sum_{\substack{e \neq 0 \\ e}} \sum_{\substack{e' \neq 0 \\ e' \neq e}} \frac{\langle 0 | \hat{\mu}_i | e \rangle \langle e | \hat{\mu}_k | e' \rangle \langle e' | \hat{\mu}_j | 0 \rangle}{\Delta E_{ge} \Delta E_{ge'}} + \\
& \sum_{\substack{e \neq 0 \\ e}} \sum_{\substack{e' \neq 0 \\ e' \neq e}} \frac{\langle 0 | \hat{\mu}_j | e \rangle \langle e | \hat{\mu}_i | e' \rangle \langle e' | \hat{\mu}_k | 0 \rangle}{\Delta E_{ge} \Delta E_{ge'}} + \sum_{\substack{e \neq 0 \\ e}} \sum_{\substack{e' \neq 0 \\ e' \neq e}} \frac{\langle 0 | \hat{\mu}_j | e \rangle \langle e | \hat{\mu}_k | e' \rangle \langle e' | \hat{\mu}_i | 0 \rangle}{\Delta E_{ge} \Delta E_{ge'}} + \\
& \sum_{\substack{e \neq 0 \\ e}} \sum_{\substack{e' \neq 0 \\ e' \neq e}} \frac{\langle 0 | \hat{\mu}_k | e \rangle \langle e | \hat{\mu}_i | e' \rangle \langle e' | \hat{\mu}_j | 0 \rangle}{\Delta E_{ge} \Delta E_{ge'}} + \sum_{\substack{e \neq 0 \\ e}} \sum_{\substack{e' \neq 0 \\ e' \neq e}} \frac{\langle 0 | \hat{\mu}_k | e \rangle \langle e | \hat{\mu}_j | e' \rangle \langle e' | \hat{\mu}_i | 0 \rangle}{\Delta E_{ge} \Delta E_{ge'}} \quad (S11)
\end{aligned}$$

since  $\beta_{ijk}$  is a diagonal matrix, we can write:

$$\begin{aligned}
\beta_{ijk}(-0); 0, 0) = & \\
& 2 \sum_{\substack{e \neq 0 \\ e}} \sum_{\substack{e' \neq 0 \\ e' > e}} \frac{\langle 0 | \hat{\mu}_i | e \rangle \langle e | \hat{\mu}_j | e' \rangle \langle e' | \hat{\mu}_k | 0 \rangle}{\Delta E_{ge} \Delta E_{ge'}} + 2 \sum_{\substack{e \neq 0 \\ e}} \sum_{\substack{e' \neq 0 \\ e' > e}} \frac{\langle 0 | \hat{\mu}_i | e \rangle \langle e | \hat{\mu}_k | e' \rangle \langle e' | \hat{\mu}_j | 0 \rangle}{\Delta E_{ge} \Delta E_{ge'}} + \\
& 2 \sum_{\substack{e \neq 0 \\ e}} \sum_{\substack{e' \neq 0 \\ e' > e}} \frac{\langle 0 | \hat{\mu}_j | e \rangle \langle e | \hat{\mu}_i | e' \rangle \langle e' | \hat{\mu}_k | 0 \rangle}{\Delta E_{ge} \Delta E_{ge'}} + 2 \sum_{\substack{e \neq 0 \\ e}} \sum_{\substack{e' \neq 0 \\ e' > e}} \frac{\langle 0 | \hat{\mu}_j | e \rangle \langle e | \hat{\mu}_k | e' \rangle \langle e' | \hat{\mu}_i | 0 \rangle}{\Delta E_{ge} \Delta E_{ge'}} + \\
& 2 \sum_{\substack{e \neq 0 \\ e}} \sum_{\substack{e' \neq 0 \\ e' > e}} \frac{\langle 0 | \hat{\mu}_k | e \rangle \langle e | \hat{\mu}_i | e' \rangle \langle e' | \hat{\mu}_j | 0 \rangle}{\Delta E_{ge} \Delta E_{ge'}} + 2 \sum_{\substack{e \neq 0 \\ e}} \sum_{\substack{e' \neq 0 \\ e' > e}} \frac{\langle 0 | \hat{\mu}_k | e \rangle \langle e | \hat{\mu}_j | e' \rangle \langle e' | \hat{\mu}_i | 0 \rangle}{\Delta E_{ge} \Delta E_{ge'}} \quad (S12)
\end{aligned}$$

From the general expressions of diagonal (Equation S10) and off-diagonal elements (Equation S12), the corresponding expressions of  $\beta_{zzz}$  and  $\beta_{zxx}$  components can be derived from substitution:

- Diagonal elements.  $\underline{\mathbf{e} = \mathbf{e}'}$

$$\beta_{zzz}(-0); 0, 0) = 6 \sum_{e \neq 0} \frac{\langle 0 | \hat{\mu}_z | e \rangle \langle e | \hat{\mu}_z | 0 \rangle \Delta \hat{\mu}_z^{0e}}{\Delta E_{ge} \Delta E_{ge}} \quad (S13)$$

$$\beta_{zxx}(-0); 0, 0) = 4 \sum_{e \neq 0} \frac{\langle 0 | \hat{\mu}_x | e \rangle \langle e | \hat{\mu}_z | 0 \rangle \Delta \hat{\mu}_x^{0e}}{\Delta E_{ge} \Delta E_{ge}} + 2 \sum_{e \neq 0} \frac{\langle 0 | \hat{\mu}_x | e \rangle \langle e | \hat{\mu}_x | 0 \rangle \Delta \hat{\mu}_z^{0e}}{\Delta E_{ge} \Delta E_{ge}} \quad (S14)$$

- Off-diagonal elements.  $\underline{\mathbf{e} \neq \mathbf{e}'}$

$$\beta_{zzz}(-0; 0, 0) = 12 \sum_{\substack{e \neq 0 \\ e}} \sum_{\substack{e' \neq 0 \\ e' > e}} \frac{\langle 0 | \hat{\mu}_z | e \rangle \langle e | \hat{\mu}_z | e' \rangle \langle e' | \hat{\mu}_z | 0 \rangle}{\Delta E_{ge} \Delta E_{ge'}} \quad (\text{S15})$$

$$\begin{aligned} \beta_{zxx}(-0; 0, 0) = & 4 \sum_{\substack{e \neq 0 \\ e}} \sum_{\substack{e' \neq 0 \\ e' > e}} \frac{\langle 0 | \hat{\mu}_x | e \rangle \langle e | \hat{\mu}_x | e' \rangle \langle e' | \hat{\mu}_z | 0 \rangle}{\Delta E_{ge} \Delta E_{ge'}} + \\ & 4 \sum_{\substack{e \neq 0 \\ e}} \sum_{\substack{e' \neq 0 \\ e' > e}} \frac{\langle 0 | \hat{\mu}_z | e \rangle \langle e | \hat{\mu}_x | e' \rangle \langle e' | \hat{\mu}_x | 0 \rangle}{\Delta E_{ge} \Delta E_{ge'}} + 4 \sum_{\substack{e \neq 0 \\ e}} \sum_{\substack{e' \neq 0 \\ e' > e}} \frac{\langle 0 | \hat{\mu}_x | e \rangle \langle e | \hat{\mu}_z | e' \rangle \langle e' | \hat{\mu}_x | 0 \rangle}{\Delta E_{ge} \Delta E_{ge'}} \end{aligned} \quad (\text{S16})$$

## S5.5 Calculation of transition electric dipole moments between excited states

Excited states  $|e\rangle$  are expressed by linear combinations of singly excited Slater determinants (including excitations and deexcitations in the TD-DFT formalism):

$$|e\rangle = \sum_{i,a} \omega_{ia} |\Phi_i^a\rangle - \sum_{i,a} \omega'_{ia} |\Phi_i^a\rangle \quad (\text{S17})$$

where  $|\Phi_i^a\rangle$  is the spin-adapted configuration state function (CSF) in which an electron of the occupied molecular orbital (MO)  $\phi_i$  is promoted to the virtual MO  $\phi_a$ .  $\omega_{ia}$  and  $\omega'_{ia}$  are the corresponding variational coefficients for excitation and deexcitation processes, respectively.

The transition dipole moment between excited states K and L is defined as:

$$\langle K | \hat{\mu} | L \rangle = \sum_i \sum_a^{\text{occ}} \sum_j \sum_b^{\text{vir}} \omega_{i,a}^K \omega_{j,b}^L V^{iajb} + \sum_i \sum_a^{\text{vir}} \omega_{i,a}^{\prime K} \sum_j \sum_b^{\text{occ}} \omega_{j,b}^{\prime L} V^{iajb} \quad (\text{S18})$$

with:

$$V^{iajb} = \begin{cases} \langle \phi_i | \hat{\mu} | \phi_a \rangle & (i = j, a \neq b) \\ -\langle \phi_i | \hat{\mu} | \phi_a \rangle & (i \neq j, a = b) \\ \mu^0 - \langle \phi_i | \hat{\mu} | \phi_i \rangle + \langle \phi_a | \hat{\mu} | \phi_a \rangle & (i = j, a = b) \\ 0 & (i \neq j, a \neq b) \end{cases} \quad (\text{S19})$$



$$\mu^0 = \sum_l^{occ} \eta_l \langle \phi_l | \hat{\mu} | \phi_l \rangle \quad (\text{S20})$$

where  $\mu^0$  corresponds to the ground state electric dipole moment with  $\eta$  being the orbital occupancy.

In practice, the MO and the excitation and deexcitation coefficients were calculated at the (TD)DFT level using Gaussian16 and provided as input for Multiwfn. To obtain accurate transition dipole moments, all mono-electronic transitions with configuration coefficients ( $\omega_{ia}$ ) larger than  $10^{-5}$  have been considered in the excited state expression.

## S5.6 Dipole and transition dipole moments of 1B-c and 2B-c

### Dipole moments of 1B-c (a.u.)

| i | j  | Z | X         | Y          |            |
|---|----|---|-----------|------------|------------|
| 0 | -- | 0 | 4.5799883 | 0.0024800  | -0.0003040 |
| 1 | -- | 1 | 6.8737157 | 0.0023214  | -0.0007082 |
| 2 | -- | 2 | 6.8114709 | 0.0046821  | 0.0001967  |
| 3 | -- | 3 | 4.8161769 | 0.0019673  | -0.0004721 |
| 4 | -- | 4 | 6.9208910 | 0.0067674  | -0.0004328 |
| 5 | -- | 5 | 7.5929532 | 0.8452615  | 0.0547691  |
| 6 | -- | 6 | 6.2008666 | -0.8438844 | -0.0553593 |
| 7 | -- | 7 | 8.1271091 | -0.0075544 | -0.0022034 |
| 8 | -- | 8 | 7.5750510 | 0.0088921  | 0.0012591  |

### Transition dipole moments of 1B-c (a.u.)

| i | j  | Z | X          | Y          |            |
|---|----|---|------------|------------|------------|
| 0 | -- | 1 | 0.0045425  | 2.0425028  | 0.2034854  |
| 0 | -- | 2 | -1.9985722 | 0.0031230  | 0.0006973  |
| 0 | -- | 3 | -0.0024333 | -0.1634675 | -0.2137337 |
| 0 | -- | 4 | 1.3858853  | 0.0067120  | -0.0025479 |
| 0 | -- | 5 | -0.0547299 | -0.9101148 | 0.3160253  |
| 0 | -- | 6 | -0.2495703 | 0.2305739  | -0.0829720 |
| 0 | -- | 7 | -0.0086440 | 0.0076814  | -0.1471194 |
| 0 | -- | 8 | -1.4690205 | -0.0034668 | 0.0027160  |
| 1 | -- | 2 | 0.0003243  | 0.4343126  | 0.1730546  |
| 1 | -- | 3 | -0.0930475 | -0.0020743 | -0.0003283 |
| 1 | -- | 4 | -0.0019721 | 2.3556787  | 0.3311802  |
| 1 | -- | 5 | 0.1400392  | -0.1970069 | -0.0063747 |
| 1 | -- | 6 | -0.0330181 | -0.8156391 | -0.0291610 |

|   |    |   |            |            |            |
|---|----|---|------------|------------|------------|
| 1 | -- | 7 | 0.2675112  | -0.0086144 | -0.0016765 |
| 1 | -- | 8 | -0.0009014 | -1.3040147 | -0.2655472 |
| 2 | -- | 3 | 0.0008610  | 0.5995837  | 0.1446198  |
| 2 | -- | 4 | 0.0139608  | -0.0007297 | -0.0000793 |
| 2 | -- | 5 | -0.0155684 | 1.1700846  | 0.1601953  |
| 2 | -- | 6 | -0.0547283 | -0.2935780 | -0.0399441 |
| 2 | -- | 7 | -0.0006080 | 2.2411892  | 0.4521968  |
| 2 | -- | 8 | 0.1557258  | -0.0117686 | -0.0026517 |
| 3 | -- | 4 | -0.0024398 | 0.4293785  | 0.1216710  |
| 3 | -- | 5 | 0.3711456  | -0.0088211 | 0.0263470  |
| 3 | -- | 6 | -0.0914181 | -0.0418499 | 0.1040359  |
| 3 | -- | 7 | 0.9530929  | 0.0049758  | 0.0001483  |
| 3 | -- | 8 | -0.0048588 | 0.6210879  | 0.0408829  |
| 4 | -- | 5 | -0.2771015 | -0.7143313 | 0.0422820  |
| 4 | -- | 6 | -1.1036891 | 0.1721297  | -0.0106414 |
| 4 | -- | 7 | -0.0013643 | 0.7174962  | 0.1273601  |
| 4 | -- | 8 | -0.4070320 | 0.0018907  | -0.0000557 |
| 5 | -- | 6 | -0.4874776 | 1.9451189  | 0.0380388  |
| 5 | -- | 7 | 0.1101523  | -0.2942684 | -0.0298756 |
| 5 | -- | 8 | -0.1745713 | -1.1002271 | 0.0208555  |
| 6 | -- | 7 | -0.0290427 | -1.1596274 | -0.1216356 |
| 6 | -- | 8 | -0.6939214 | 0.2811909  | -0.0049685 |
| 7 | -- | 8 | -0.0022903 | -1.2555534 | -0.2384175 |

#### Dipole moments of 2B-c (a.u.)

| i |    | j | X          | Z          | Y          |
|---|----|---|------------|------------|------------|
| 0 | -- | 0 | 0.0000102  | -3.1204199 | -0.0000928 |
| 1 | -- | 1 | 0.0000787  | -4.1004017 | -0.0001180 |
| 2 | -- | 2 | 0.0000787  | -4.0982377 | -0.0000787 |
| 3 | -- | 3 | -0.0001574 | -5.3851142 | -0.0001180 |
| 4 | -- | 4 | 0.0000000  | -3.2850035 | -0.0000787 |
| 5 | -- | 5 | -0.0000393 | -5.6369261 | -0.0001180 |
| 6 | -- | 6 | -0.0001180 | -3.3823445 | -0.0000787 |
| 7 | -- | 7 | 0.0024394  | -5.4302830 | -0.0001180 |
| 8 | -- | 8 | -0.0023607 | -5.3013081 | -0.0000787 |

#### Transition dipole moments of 2B-c (a.u.)

| i |    | j | X          | Z          | Y          |
|---|----|---|------------|------------|------------|
| 0 | -- | 1 | -2.4364821 | -0.0000862 | 0.0100789  |
| 0 | -- | 2 | 0.0000909  | -2.3752952 | -0.0000074 |
| 0 | -- | 3 | -1.6094784 | 0.0000060  | 0.0058395  |
| 0 | -- | 4 | 0.0185548  | 0.0000314  | -0.1406531 |
| 0 | -- | 5 | -0.0000776 | -0.3608386 | -0.0000119 |

|   |    |   |            |            |            |
|---|----|---|------------|------------|------------|
| 0 | -- | 6 | -0.0003168 | 0.0696568  | -0.0000232 |
| 0 | -- | 7 | -0.0007548 | -0.3441448 | 0.0000057  |
| 0 | -- | 8 | 1.4381778  | -0.0003227 | 0.0637182  |
| 1 | -- | 2 | -0.4338645 | 0.0000015  | 0.0235064  |
| 1 | -- | 3 | -0.0000235 | -0.0781972 | 0.0000014  |
| 1 | -- | 4 | -0.0000345 | 0.0443888  | 0.0000164  |
| 1 | -- | 5 | -3.5306169 | 0.0000332  | -0.0259144 |
| 1 | -- | 6 | -0.5514797 | 0.0000164  | 0.0083926  |
| 1 | -- | 7 | 1.1092232  | 0.0002344  | 0.0215591  |
| 1 | -- | 8 | 0.0000376  | -0.3969454 | 0.0000088  |
| 2 | -- | 3 | -2.8784267 | -0.0000081 | -0.0276668 |
| 2 | -- | 4 | -0.1276866 | 0.0000140  | 0.0092342  |
| 2 | -- | 5 | 0.0000012  | -0.2578911 | 0.0000048  |
| 2 | -- | 6 | -0.0001621 | 0.0376882  | -0.0000097 |
| 2 | -- | 7 | -0.0002062 | -0.4505528 | -0.0000011 |
| 2 | -- | 8 | 0.5377914  | -0.0002611 | 0.0254455  |
| 3 | -- | 4 | -0.0000207 | -0.1031273 | 0.0000024  |
| 3 | -- | 5 | 1.6674051  | -0.0000153 | 0.0310706  |
| 3 | -- | 6 | 0.3777807  | 0.0000596  | 0.0824921  |
| 3 | -- | 7 | -1.3108598 | 0.0002423  | 0.0161975  |
| 3 | -- | 8 | -0.0004417 | -0.2653197 | 0.0000292  |
| 4 | -- | 5 | 0.2066502  | -0.0000140 | 0.0606412  |
| 4 | -- | 6 | 0.5307667  | -0.0000199 | 0.0394265  |
| 4 | -- | 7 | 0.0086792  | -0.0000995 | -0.0105667 |
| 4 | -- | 8 | 0.0000902  | 0.0840948  | 0.0000070  |
| 5 | -- | 6 | 0.0002108  | -0.3508591 | -0.0000045 |
| 5 | -- | 7 | 0.0007550  | 0.1173238  | 0.0000050  |
| 5 | -- | 8 | -1.3678887 | -0.0006543 | 0.0062025  |
| 6 | -- | 7 | 0.0003668  | 0.4715664  | 0.0000002  |
| 6 | -- | 8 | 0.3016649  | 0.0004022  | 0.0046345  |
| 7 | -- | 8 | -3.0161778 | 0.0001987  | 0.0211561  |

## References

- (S1) Largent, R. J.; Polik, W. F.; Schmidt, J. R. Symmetrizer: Algorithmic determination of point groups in nearly symmetric molecules. *J. Comput. Chem.* **2012**, *33*, 1637–1642.
